# Supplementary material for: Perspectives and Attitudes towards the Functional and Safety Aspects of Seaweeds for Edible Applications in India
Source: MDPI journal article supplement (doi:10.3390/foods10123026), 2021-12-06
Supplement: s1 [file s1]

## Personal details:

1. Please select your age from the below mentioned brackets

☐ 15-20

☐ 21-30

☐ 31-50

☐ 50 and above

2. Please select the gender

☐ Male

☐ Female

☐ Transgender

3. Please select your present status

☐ Taking secondary or higher secondary education

☐ Student of graduation or post-graduation

☐ Self-employed

☐ Business

☐ Private sector service

☐ Government service

☐ Homecare/home maker

☐ Pursuing higher studies i.e. PhD/MS/MD

☐ Academic/Educational duties i.e. Teachers/Lab. assistant/Assistant Prof./Associate Prof./Professor

☐ Retired person

☐ Other

4. Please select your diet preference

☐ Strictly vegetarian

☐ Eggetarian and Vegetarian

☐ Strictly non-vegetarian

☒ Partly non-vegetarian

## Fundamental understanding:

5. Any previous knowledge about seaweed based foods?
- ☐ Yes ☐ No
6. If yes, do you have knowledge about its nutritional contents?
- ☐ Yes ☐ No
7. If no, would you like to know more about this vegetarian alternative as a source of nutrition that has essential vitamin and mineral contents?
- ☐ Yes ☐ No
8. Seaweeds are a kind of marine plants (grow in seawater) and a rich source of antioxidants, essential minerals and dietary fibers. Do you agree they should be part of routine diet?
- ☐ Strongly agree
- ☐ Agree
- ☐ May be
- ☐ Disagree
- ☐ Strongly disagree
9. If yes, what would be your preference in your diet?
- ☐ As a part of maincourse
- ☐ As a supplement/additive
- ☐ As a soup
- ☐ As a salad dressing
- ☐ As a pickle
10. If no, pick up a reason
- ☐ Issues with taste
- ☐ Issues with smell
- ☐ Due to the reliability of source
11. Are you aware that seaweeds are known to play role in extending life span of human beings?
- ☐ Yes ☐ No

12. Are you aware that seaweeds are part of routine diet in various Asian countries like Japan, Philippines, Indonesia and China?
- ☐ Yes ☐ No
13. Are you aware of restaurants that provide seaweed based snacks and meal in India?
- ☐ Yes ☐ No
14. Due to the contents of antioxidants, seaweeds are also used in cosmetic industries. Did you know such different uses of seaweeds?
- ☐ Yes ☐ No
15. Do you believe, for India having a long coastal area, seaweed cultivation can be an excellent opportunity for business?
- ☐ Strongly agree
- ☐ Agree
- ☐ May be
- ☐ Disagree
- ☐ Strongly disagree

## **Safety concerns**

16. Would you consider its source as an important factor prior to consumption?
- ☐ Yes ☐ No ☐ May be
17. The cultivation of seaweed takes place along with the marine life forms, does that affects your preference as food?
- ☐ Yes ☐ No ☐ May be
18. If yes, would you prefer to have an indoor-cultivated (grown using large seawater tanks) seaweed for food purpose.
- ☐ Yes ☐ No ☐ May be
19. Do you believe there are risks associated with fresh/untreated use of seaweeds as food?
- ☐ Yes ☐ No ☐ May be
20. Do you think that seaweed can be treated before consuming so that it does not pose any risk?
- ☐ Yes ☐ No ☐ May be

21. Do you believe, the capability of seaweed to absorb heavy metals can negatively affect your health?

- ☐ Strongly agree
- ☐ Agree
- ☐ Require further analysis
- ☐ Disagree
- ☐ Strongly disagree

22. Do you believe, it may be associated with bacteria/fungi other microbes or pathogens that can cause diseases?

- ☐ Strongly agree
- ☐ Agree
- ☐ Require further analysis
- ☐ Disagree
- ☐ Strongly disagree

23. Foods with bioactive compounds are known to improve passive immunity, how much you agree to include such foods to be included in your routine diet?

- ☐ Strongly agree
- ☐ Agree
- ☐ Require further analysis
- ☐ Disagree
- ☐ Strongly disagree

24. Seaweeds are rich in bioactive compounds which have antiviral activities, do you believe it should be included in your routine diet?

- ☐ Strongly agree
- ☐ Agree
- ☐ Require further analysis
- ☐ Disagree
- ☐ Strongly disagree

25. Does the origin of bioactive compounds with antiviral/antibacterial activity matters for you prior its intake?

- ☐ Strongly agree
- ☐ Agree
- ☐ No preference
- ☐ Disagree
- ☐ Strongly disagree

**Supplementary Table S1**

| <b>SN</b> | <b>NEP-Perspective</b>                                                                              | <b>Strongly Agree</b> | <b>Agree</b> | <b>Neutral</b> | <b>Disagree</b> | <b>Strongly Disagree</b> |
|-----------|-----------------------------------------------------------------------------------------------------|-----------------------|--------------|----------------|-----------------|--------------------------|
| 1         | Humans have the right to modify the natural environment to suit their needs                         |                       |              |                |                 |                          |
| 2         | We are approaching the limit of the number of people the earth can support.                         |                       |              |                |                 |                          |
| 3         | When humans interfere with nature it often produces disastrous consequences                         |                       |              |                |                 |                          |
| 4         | Human ingenuity will ensure that we do not make the earth unlivable.                                |                       |              |                |                 |                          |
| 5         | Humans are severely abusing the environment                                                         |                       |              |                |                 |                          |
| 6         | The Earth has plenty of natural resources if we just learn how to develop them                      |                       |              |                |                 |                          |
| 7         | Plants and animals have as much right as humans to exist.                                           |                       |              |                |                 |                          |
| 8         | The balance of nature is strong enough to cope with the impacts of modern industrial nations        |                       |              |                |                 |                          |
| 9         | Despite our special abilities, humans are still subject to the laws of nature.                      |                       |              |                |                 |                          |
| 10        | The so-called “ecological crisis” facing humankind has been greatly exaggerated.                    |                       |              |                |                 |                          |
| 11        | The Earth is like a spaceship with very limited room and resources                                  |                       |              |                |                 |                          |
| 12        | Humans were meant to rule over the rest of nature.                                                  |                       |              |                |                 |                          |
| 13        | The balance of nature is very delicate and easily upset.                                            |                       |              |                |                 |                          |
| 14        | Humans will eventually learn enough about how nature works to be able to control it.                |                       |              |                |                 |                          |
| 15        | If things continue on their present course, we will soon experience a major ecological catastrophe. |                       |              |                |                 |                          |
